# Supplementary material for: Accurate determination of reaction energetics and kinetics of the HO2˙ + O3 → OH˙ + 2O2 reaction
Source: Royal Society of Chemistry journal article supplement (doi:10.1039/d3cp00135k), 2023-01-01

**ESI of**

**Accurate determination of reaction energetics**

**and kinetics of  $\text{HO}_2^\bullet + \text{O}_3 \rightarrow \text{OH}^\bullet + 2\text{O}_2$  reaction**

Philips Kumar Rai<sup>†</sup> and Pradeep Kumar<sup>\*,‡</sup>

*†Department of Chemistry, Malaviya National Institute of Technology Jaipur, Jaipur,  
302017, India*

*‡Department of Chemistry, Malaviya National Institute of Technology Jaipur, Jaipur,  
302017, India*

E-mail: pradeep.chy@mnit.ac.in

**S. No.****Contents**

1. **Table S1:** Cartesian coordinates and all normal mode frequencies of the optimized geometries calculated at CCSD(T)/6-311++G\*\* level of theory.
2. **Figure S1:** Gibbs free energy profile for the  $\text{HO}_2^\bullet + \text{O}_3$  reaction at 298 K including post-CCSD(T) corrections.
3. **Figure S2:** Optical isomers of  $\text{TS}_H$  with bond lengths (in Angstrom) and (angle in degree).
4. **Table S2:** Comparison of frequencies (in  $\text{cm}^{-1}$ ) and geometrical parameters of the isolated species, obtained in present work (CCSD(T)/6-311++G\*\*) with the experimental<sup>1</sup> and higher-level theoretical data (CCSD(T)/aug-cc-pVTZ)<sup>1</sup> available in the literature.
5. **Table S3:** Rate constant values obtained at TST ( $k_{TST}$ ) and CVT ( $k_{CVT}$ ) level along with ZCT, SCT and Eckart tunneling coefficients. The rate constants are in  $\text{cm}^3 \cdot \text{molecule}^{-1} \cdot \text{s}^{-1}$ .
6. **Table S4:** The rate constant values for  $\text{HO}_2^\bullet + \text{O}_3$  reaction with rigid rotor harmonic approximation ( $k_{WTHR}$ ) along with hindered rotor approximation ( $k_{HR}$ ). The values are given in  $\text{cm}^3 \cdot \text{molecule}^{-1} \cdot \text{s}^{-1}$ .
7. **Figure S3:** IRC for the hydrogen abstraction transition state (bond lengths are in  $\text{\AA}$ ) obtained at M11/6-311++G(2df,2p) level of theory.
8. **Figure S4:** IRC for the oxygen abstraction transition state (bond lengths are in  $\text{\AA}$ ) obtained at M11/6-311++G(2df,2p) level of theory.

Table S1: Cartesian coordinates and all normal mode frequencies of the optimized geometries calculated at CCSD(T)/6-311++G\*\* level of theory.

| Species                      | Cartesian coordinate (Å) |           |           | Frequencies (cm <sup>-1</sup> ) |          |         |         |
|------------------------------|--------------------------|-----------|-----------|---------------------------------|----------|---------|---------|
|                              | O                        | 0.000000  | 0.000000  | 0.000000                        |          |         |         |
| HO <sub>2</sub> <sup>•</sup> | O                        | 0.000000  | 0.000000  | 1.334705                        | 1129.04  | 1428.41 | 3675.13 |
|                              | H                        | 0.941318  | 0.000000  | -0.246989                       |          |         |         |
|                              | O                        | 0.000000  | 0.000000  | 0.000000                        |          |         |         |
| O <sub>3</sub>               | O                        | 0.000000  | 0.000000  | 1.276127                        | 717.24   | 1014.31 | 1139.99 |
|                              | O                        | 1.135784  | 0.000000  | -0.582218                       |          |         |         |
|                              | O                        | 0.000000  | 0.000000  | 0.000000                        |          |         |         |
|                              | O                        | 0.000000  | 0.000000  | 1.278584                        | 76.78    | 95.03   | 110.76  |
| RC                           | H                        | 1.955899  | 0.000000  | 1.942882                        | 167.56   | 189.06  | 365.36  |
|                              | O                        | 2.759814  | 0.551893  | 1.950201                        | 729.56   | 1060.69 | 1116.05 |
|                              | O                        | 2.522015  | 1.473292  | 1.016889                        | 1138.80  | 1468.36 | 3651.87 |
|                              | O                        | 1.000411  | -0.527031 | -0.571230                       |          |         |         |
|                              | O                        | 1.600142  | -0.719797 | -0.433836                       |          |         |         |
|                              | O                        | 1.005564  | -0.050578 | 0.463970                        | -2062.76 | 87.84   | 135.47  |
| TS <sub>H</sub>              | O                        | 0.559127  | 1.152499  | 0.065909                        | 205.47   | 392.20  | 634.47  |
|                              | H                        | -0.732216 | 0.868261  | -0.260560                       | 702.88   | 831.54  | 1028.48 |
|                              | O                        | -1.643709 | 0.297655  | -0.355927                       | 1138.99  | 1373.05 | 1705.07 |
|                              | O                        | -1.429598 | -0.788312 | 0.292454                        |          |         |         |
|                              | O                        | 0.000000  | 0.000000  | 0.000000                        |          |         |         |
|                              | O                        | 0.000000  | 0.000000  | 1.267932                        | -2075.44 | 87.09   | 134.46  |

|                              |   |           |           |           |         |         |         |
|------------------------------|---|-----------|-----------|-----------|---------|---------|---------|
| TS <sub>Iso</sub>            | O | 1.220117  | 0.000000  | 1.830238  | 205.01  | 392.59  | 632.23  |
|                              | H | 1.410077  | -1.324923 | 2.077084  | 703.47  | 831.35  | 1028.78 |
|                              | O | 1.182321  | -2.378302 | 2.148246  | 1138.57 | 1371.75 | 1706.30 |
|                              | O | -0.076682 | -2.464872 | 1.918972  |         |         |         |
|                              | O | 0.000000  | 0.000000  | 0.000000  |         |         |         |
|                              | O | 0.000000  | 0.000000  | 1.288007  | -571.09 | 74.07   | 132.15  |
| TS <sub>O</sub>              | O | 1.245748  | 0.000000  | 1.821167  | 289.95  | 337.51  | 532.36  |
|                              | O | 1.848161  | -1.733234 | 1.527554  | 653.18  | 770.77  | 1043.71 |
|                              | O | 2.778188  | -1.665882 | 0.558501  | 1092.02 | 1451.32 | 3674.32 |
|                              | H | 2.261195  | -1.656527 | -0.267059 |         |         |         |
|                              | O | -0.177560 | -0.543580 | 0.001715  |         |         |         |
| HO <sub>3</sub> <sup>•</sup> | O | -1.108059 | 0.306054  | -0.001192 | 252.45  | 486.00  | 738.91  |
|                              | O | 1.173668  | 0.107445  | -0.001973 | 1208.45 | 1391.76 | 3715.73 |
|                              | H | 0.895617  | 1.040647  | 0.011603  |         |         |         |
| O <sub>2</sub>               | O | 0.000000  | 0.000000  | 0.000000  |         | 1590.93 |         |
|                              | O | 0.000000  | 0.000000  | 1.211348  |         |         |         |
| HO <sup>•</sup>              | O | 0.000000  | 0.000000  | 0.000000  |         | 3753.95 |         |
|                              | H | 0.000000  | 0.000000  | 0.972610  |         |         |         |

---

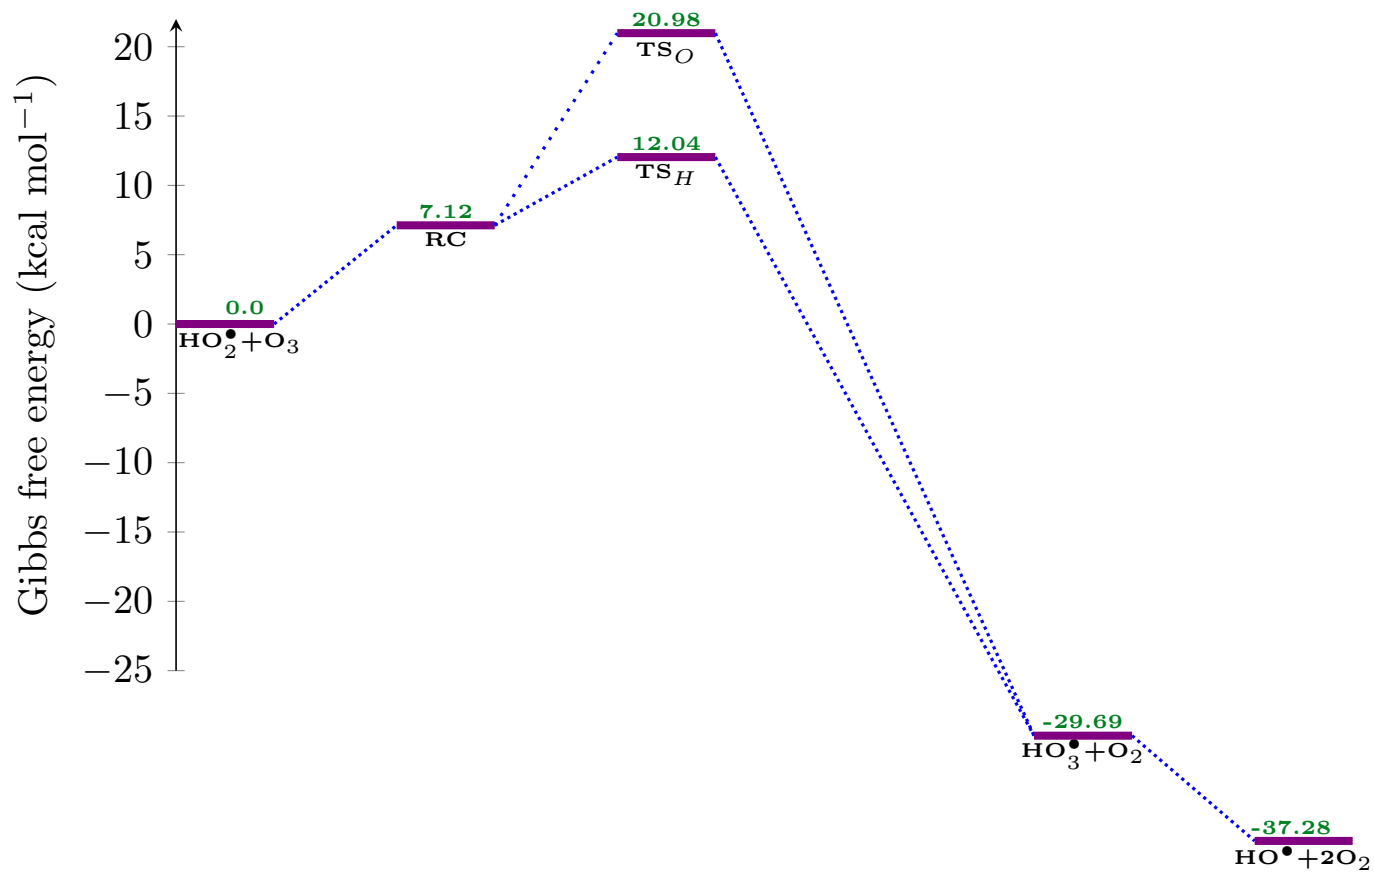

Figure S1: Gibbs free energy profile for the  $\text{HO}_2^\bullet + \text{O}_3$  reaction at 298 K including post-CCSD(T) corrections.

Figure S2: Optical isomers of  $TS_H$  with bond lengths (in Angstrom) and (angle in degree).

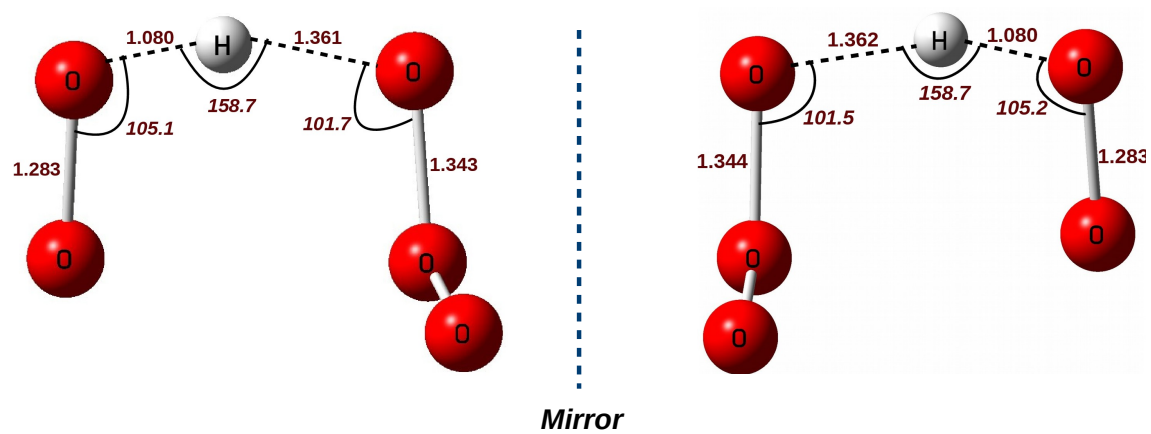

Table S2: Comparison of frequencies (in  $\text{cm}^{-1}$ ) and geometrical parameters of the isolated species, obtained in present work (CCSD(T)/6-311++G\*\*) with the experimental<sup>1</sup> and higher-level theoretical data (CCSD(T)/aug-cc-pVTZ)<sup>1</sup> available in the literature.

| Methods             | Species               | Frequencies |      |      | Bond lengths ( $\text{\AA}$ ) |           | Angles ( $^\circ$ ) |             |
|---------------------|-----------------------|-------------|------|------|-------------------------------|-----------|---------------------|-------------|
|                     |                       |             |      |      | $R_{O-H}$                     | $R_{O-O}$ | $A_{H-O-O}$         | $A_{O-O-O}$ |
| Experiment          | $\text{HO}_2^\bullet$ | 1098        | 1392 | 3436 | 0.97                          | 1.33      | 104.3               |             |
|                     | $\text{O}_3$          | 716         | 1089 | 1135 |                               | 1.28      |                     | 116.8       |
|                     | $\text{HO}^\bullet$   |             | 3738 |      | 0.97                          |           |                     |             |
|                     | $\text{O}_2$          |             | 1580 |      |                               | 1.21      |                     |             |
| CCSD(T)/aug-cc-pVTZ | $\text{HO}_2^\bullet$ | 1125        | 1429 | 3641 | 0.97                          | 1.34      | 104.2               |             |
|                     | $\text{O}_3$          | 714         | 1038 | 1147 |                               | 1.28      |                     | 117.1       |
|                     | $\text{HO}^\bullet$   |             | 3713 |      | 0.97                          |           |                     |             |
|                     | $\text{O}_2$          |             | 1574 |      |                               | 1.21      |                     |             |
| CCSD(T)/6-311++G**  | $\text{HO}_2^\bullet$ | 1129        | 1428 | 3675 | 0.97                          | 1.33      | 104.7               |             |
|                     | $\text{O}_3$          | 717         | 1014 | 1139 |                               | 1.28      |                     | 117.1       |
|                     | $\text{HO}^\bullet$   |             | 3753 |      | 0.97                          |           |                     |             |
|                     | $\text{O}_2$          |             | 1590 |      |                               | 1.21      |                     |             |

1. Johnson III, R. D. NIST computational chemistry comparison and benchmark database, NIST standard reference database number 101. Release 16a <http://cccbdb.nist.gov/> (accessed Jan 10, 2023) **2013**.

Table S3: Rate constant values obtained at TST ( $k_{TST}$ ) and CVT ( $k_{CVT}$ ) level along with ZCT, SCT and Eckart tunneling coefficients. The rate constants are in  $\text{cm}^3 \cdot \text{molecule}^{-1} \cdot \text{s}^{-1}$ .

| T(K) | TST                    | CVT                    | ZCT   | SCT    | Eckart |
|------|------------------------|------------------------|-------|--------|--------|
| 197  | $9.32 \times 10^{-18}$ | $5.61 \times 10^{-18}$ | 55.47 | 119.35 | 98.97  |
| 202  | $1.15 \times 10^{-17}$ | $6.93 \times 10^{-18}$ | 47.10 | 99.47  | 83.45  |
| 204  | $1.24 \times 10^{-17}$ | $7.53 \times 10^{-18}$ | 44.24 | 92.73  | 78.14  |
| 208  | $1.45 \times 10^{-17}$ | $8.83 \times 10^{-18}$ | 39.19 | 80.93  | 68.86  |
| 211  | $1.63 \times 10^{-17}$ | $9.92 \times 10^{-18}$ | 35.92 | 73.35  | 62.83  |
| 219  | $2.17 \times 10^{-17}$ | $1.33 \times 10^{-17}$ | 28.88 | 57.23  | 49.91  |
| 225  | $2.67 \times 10^{-17}$ | $1.64 \times 10^{-17}$ | 24.83 | 48.12  | 42.54  |
| 230  | $3.14 \times 10^{-17}$ | $1.94 \times 10^{-17}$ | 22.05 | 41.97  | 37.54  |
| 232  | $3.35 \times 10^{-17}$ | $2.07 \times 10^{-17}$ | 21.07 | 39.81  | 35.77  |
| 233  | $3.45 \times 10^{-17}$ | $2.14 \times 10^{-17}$ | 20.60 | 38.79  | 34.92  |
| 238  | $4.03 \times 10^{-17}$ | $2.51 \times 10^{-17}$ | 18.47 | 34.18  | 31.08  |
| 243  | $4.68 \times 10^{-17}$ | $2.92 \times 10^{-17}$ | 16.66 | 30.30  | 27.85  |
| 245  | $4.95 \times 10^{-17}$ | $3.10 \times 10^{-17}$ | 16.01 | 28.92  | 26.69  |
| 250  | $5.71 \times 10^{-17}$ | $3.58 \times 10^{-17}$ | 14.55 | 25.84  | 24.07  |
| 253  | $6.20 \times 10^{-17}$ | $3.89 \times 10^{-17}$ | 13.76 | 24.20  | 22.69  |
| 265  | $8.48 \times 10^{-17}$ | $5.36 \times 10^{-17}$ | 11.21 | 18.98  | 18.17  |
| 267  | $8.92 \times 10^{-17}$ | $5.64 \times 10^{-17}$ | 10.85 | 18.27  | 17.56  |
| 270  | $9.60 \times 10^{-17}$ | $6.08 \times 10^{-17}$ | 10.36 | 17.28  | 16.69  |
| 273  | $1.03 \times 10^{-16}$ | $6.54 \times 10^{-17}$ | 9.90  | 16.37  | 15.89  |
| 274  | $1.06 \times 10^{-16}$ | $6.70 \times 10^{-17}$ | 9.75  | 16.08  | 15.63  |
| 280  | $1.22 \times 10^{-16}$ | $7.73 \times 10^{-17}$ | 8.95  | 14.50  | 14.23  |
| 283  | $1.30 \times 10^{-16}$ | $8.29 \times 10^{-17}$ | 8.58  | 13.80  | 13.60  |
| 296  | $1.73 \times 10^{-16}$ | $1.10 \times 10^{-16}$ | 7.26  | 11.29  | 11.32  |
| 297  | $1.76 \times 10^{-16}$ | $1.13 \times 10^{-16}$ | 7.18  | 11.13  | 11.17  |
| 298  | $1.80 \times 10^{-16}$ | $1.15 \times 10^{-16}$ | 7.09  | 10.97  | 11.03  |
| 320  | $2.77 \times 10^{-16}$ | $1.78 \times 10^{-16}$ | 5.59  | 8.23   | 8.47   |
| 323  | $2.93 \times 10^{-16}$ | $1.89 \times 10^{-16}$ | 5.43  | 7.94   | 8.20   |
| 333  | $3.50 \times 10^{-16}$ | $2.26 \times 10^{-16}$ | 4.95  | 7.10   | 7.39   |
| 334  | $3.56 \times 10^{-16}$ | $2.30 \times 10^{-16}$ | 4.91  | 7.03   | 7.32   |
| 342  | $4.07 \times 10^{-16}$ | $2.64 \times 10^{-16}$ | 4.59  | 6.47   | 6.78   |
| 343  | $4.14 \times 10^{-16}$ | $2.68 \times 10^{-16}$ | 4.55  | 6.40   | 6.72   |
| 345  | $4.28 \times 10^{-16}$ | $2.77 \times 10^{-16}$ | 4.47  | 6.28   | 6.60   |
| 350  | $4.64 \times 10^{-16}$ | $3.01 \times 10^{-16}$ | 4.30  | 5.98   | 6.31   |
| 360  | $5.43 \times 10^{-16}$ | $3.53 \times 10^{-16}$ | 3.99  | 5.47   | 5.80   |
| 365  | $5.86 \times 10^{-16}$ | $3.81 \times 10^{-16}$ | 3.86  | 5.24   | 5.57   |
| 373  | $6.60 \times 10^{-16}$ | $4.30 \times 10^{-16}$ | 3.66  | 4.91   | 5.24   |
| 380  | $7.30 \times 10^{-16}$ | $4.76 \times 10^{-16}$ | 3.50  | 4.65   | 4.98   |
| 400  | $9.58 \times 10^{-16}$ | $6.26 \times 10^{-16}$ | 3.12  | 4.04   | 4.36   |
| 413  | $1.13 \times 10^{-15}$ | $7.41 \times 10^{-16}$ | 2.92  | 3.72   | 4.03   |
| 450  | $1.75 \times 10^{-15}$ | $1.15 \times 10^{-15}$ | 2.48  | 3.06   | 3.33   |



Table S4: The rate constant values for HO<sub>2</sub><sup>•</sup>+O<sub>3</sub> reaction with rigid rotor harmonic approximation ( $k_{WTHR}$ ) along with hindered rotor approximation ( $k_{HR}$ ). The values are given in cm<sup>3</sup>·molecule<sup>-1</sup>·s<sup>-1</sup>.

| T (K) | $k_{WTHR}$             | $k_{HR}$               |
|-------|------------------------|------------------------|
| 197   | $2.37 \times 10^{-15}$ | $1.51 \times 10^{-15}$ |
| 202   | $2.30 \times 10^{-15}$ | $1.52 \times 10^{-15}$ |
| 204   | $2.28 \times 10^{-15}$ | $1.52 \times 10^{-15}$ |
| 208   | $2.24 \times 10^{-15}$ | $1.52 \times 10^{-15}$ |
| 211   | $2.20 \times 10^{-15}$ | $1.52 \times 10^{-15}$ |
| 219   | $2.13 \times 10^{-15}$ | $1.53 \times 10^{-15}$ |
| 225   | $2.08 \times 10^{-15}$ | $1.53 \times 10^{-15}$ |
| 230   | $2.05 \times 10^{-15}$ | $1.53 \times 10^{-15}$ |
| 232   | $2.03 \times 10^{-15}$ | $1.53 \times 10^{-15}$ |
| 233   | $2.03 \times 10^{-15}$ | $1.53 \times 10^{-15}$ |
| 238   | $2.00 \times 10^{-15}$ | $1.54 \times 10^{-15}$ |
| 243   | $1.97 \times 10^{-15}$ | $1.54 \times 10^{-15}$ |
| 245   | $1.96 \times 10^{-15}$ | $1.54 \times 10^{-15}$ |
| 250   | $1.94 \times 10^{-15}$ | $1.54 \times 10^{-15}$ |
| 253   | $1.93 \times 10^{-15}$ | $1.54 \times 10^{-15}$ |
| 265   | $1.90 \times 10^{-15}$ | $1.56 \times 10^{-15}$ |
| 267   | $1.89 \times 10^{-15}$ | $1.56 \times 10^{-15}$ |
| 270   | $1.88 \times 10^{-15}$ | $1.56 \times 10^{-15}$ |
| 273   | $1.88 \times 10^{-15}$ | $1.57 \times 10^{-15}$ |
| 274   | $1.88 \times 10^{-15}$ | $1.57 \times 10^{-15}$ |
| 280   | $1.87 \times 10^{-15}$ | $1.58 \times 10^{-15}$ |
| 283   | $1.87 \times 10^{-15}$ | $1.58 \times 10^{-15}$ |
| 296   | $1.86 \times 10^{-15}$ | $1.61 \times 10^{-15}$ |
| 297   | $1.86 \times 10^{-15}$ | $1.61 \times 10^{-15}$ |
| 298   | $1.86 \times 10^{-15}$ | $1.61 \times 10^{-15}$ |
| 320   | $1.89 \times 10^{-15}$ | $1.68 \times 10^{-15}$ |
| 323   | $1.89 \times 10^{-15}$ | $1.69 \times 10^{-15}$ |
| 333   | $1.91 \times 10^{-15}$ | $1.72 \times 10^{-15}$ |
| 334   | $1.92 \times 10^{-15}$ | $1.73 \times 10^{-15}$ |
| 342   | $1.94 \times 10^{-15}$ | $1.76 \times 10^{-15}$ |
| 343   | $1.94 \times 10^{-15}$ | $1.76 \times 10^{-15}$ |
| 345   | $1.95 \times 10^{-15}$ | $1.77 \times 10^{-15}$ |
| 350   | $1.97 \times 10^{-15}$ | $1.79 \times 10^{-15}$ |
| 360   | $2.00 \times 10^{-15}$ | $1.84 \times 10^{-15}$ |
| 365   | $2.03 \times 10^{-15}$ | $1.87 \times 10^{-15}$ |
| 373   | $2.06 \times 10^{-15}$ | $1.91 \times 10^{-15}$ |
| 380   | $2.10 \times 10^{-15}$ | $1.95 \times 10^{-15}$ |
| 400   | $2.21 \times 10^{-15}$ | $2.08 \times 10^{-15}$ |
| 413   | $2.30 \times 10^{-15}$ | $2.18 \times 10^{-15}$ |
| 450   | $2.60 \times 10^{-15}$ | $2.49 \times 10^{-15}$ |

Figure S3: IRC for the hydrogen abstraction transition state (bond lengths are in Å) obtained at M11/6-311++G(2df,2p) level of theory.

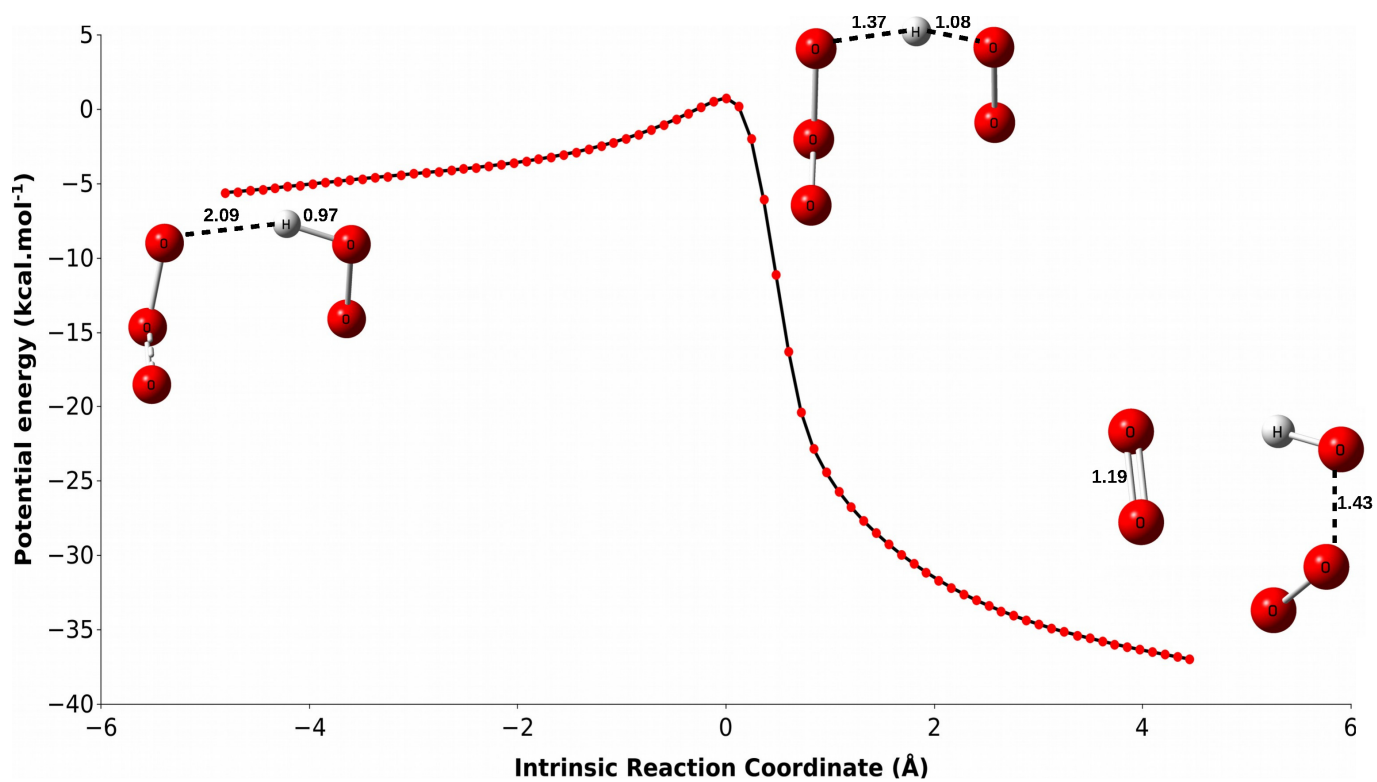

Figure S4: IRC for the oxygen abstraction transition state (bond lengths are in Å) obtained at M11/6-311++G(2df,2p) level of theory.

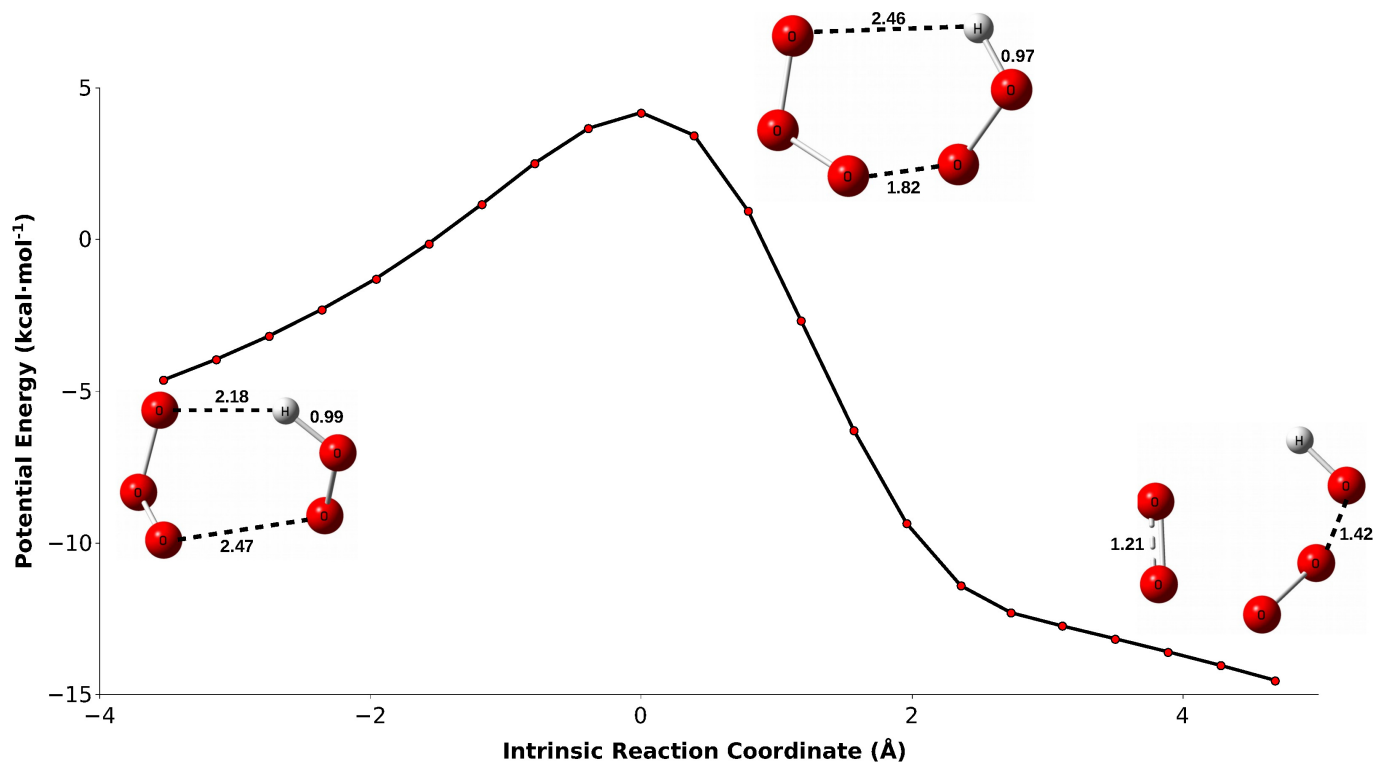

Supplement: d3cp00135k1.pdf [file d3cp00135k1.pdf]
